# Supplementary material for: The Trace Detection of Nitrite Ions Using Neutral Red Functionalized SH-β-Cyclodextrin @Au Nanoparticles
Source: MDPI journal article supplement (doi:10.3390/s18030681), 2018-02-25
Supplement: s1 [file s1]

## Supplementary Materials

### The Trace Detection of Nitrite Ions Using Neutral Red Functionalized SH- $\beta$ -Cyclodextrin @Au Nanoparticles

**Figure S1.** (A) UV-Vis spectrum of AuNPs; (B) TEM image of AuNPs.

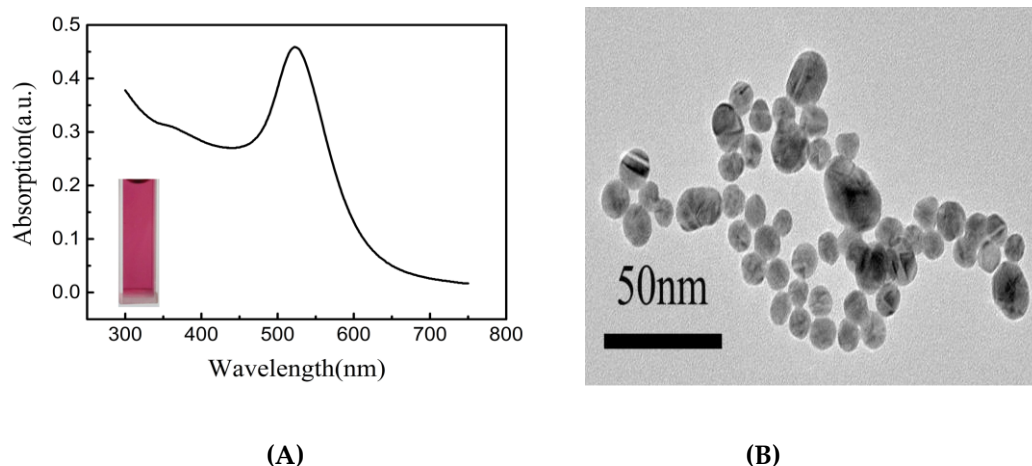

AuNPs were prepared from  $\text{HAuCl}_4$  by the reduction of sodium citrate. Briefly, 1 mL of  $\text{HAuCl}_4$  solution with a mass percentage of 1% and 4 mL of sodium citrate with a 1% mass percent were added to 25 mL of ultra-pure water. The mixture was stirred for 10 minutes in a microwave reactor at  $120^\circ\text{C}$  with a microwave power of 150 W.  $\beta\text{-CD@AuNPs}$  was ultimately obtained as a purple liquid and was stored at  $4^\circ\text{C}$ .

The UV-Vis spectrum of AuNPs is shown in Figure S1A. An absorption band at 526 nm indicates a characteristic feature of AuNPs. The TEM image is

shown in Figure S1 B. Some of the particles were larger than 10 nm, and some had irregular spherical shapes.

**Figure S2.** (A) Emission spectra of NR (a) NR- $\beta$ -CD@AuNPs (b) and NR- $\beta$ -CD(c); (B) TEM images of NO<sub>2</sub>-NR- $\beta$ -CD.

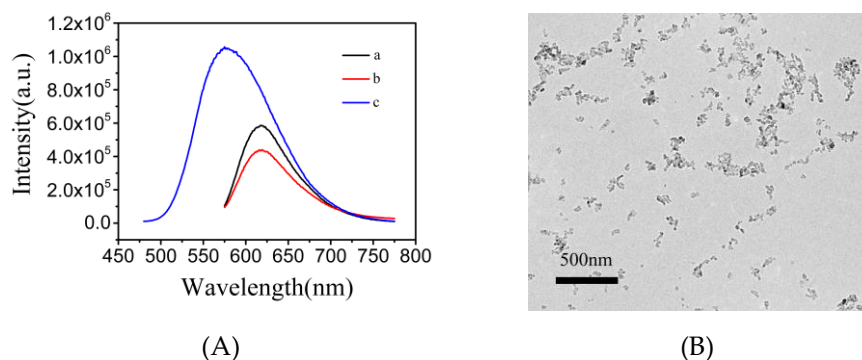

Five milliliters of NR ( $5 \times 10^{-6} \text{ mol} \cdot \text{L}^{-1}$ ) was added to 10 mL of ultra-pure water, and the mixture was stirred in the dark at room temperature for 80 minutes to produce a solution of NR. In a typical case, 5 mL of NaHCO<sub>3</sub>-borax buffer solution and 5 mL of NR ( $5 \times 10^{-6} \text{ mol} \cdot \text{L}^{-1}$ ) were added to 5 mL of ultra-pure water, and the mixture was stirred in the dark at room temperature for 80 minutes to produce a solution of NR- $\beta$ -CD.

Then, 14.99 mg of NaNO<sub>2</sub> was dissolved in ultra-pure water to prepare 100.0 mg·L<sup>-1</sup> of standard solution, which was diluted to the desired concentrations for further use. Next, 2.1 mL of NaNO<sub>2</sub> standard solution and 0.8 mL of HCl (1.50 mg·L<sup>-1</sup>) solution were sequentially added into a 5-mL colorimetric tube, followed by an addition of 0.7 mL of NR- $\beta$ -CD or NR solution as prepared above. The fluorescence spectra of NO<sub>2</sub>-NR- $\beta$ -CD or NO<sub>2</sub>-NR were obtained after 5 minutes.

The emission spectra of NR (a), NR- $\beta$ -CD@AuNPs (b) and NR- $\beta$ -CD (c) are shown in Figure S2A. The emission peaks were 623 nm, 621 nm, and 523 nm, respectively. The TEM image of NO<sub>2</sub>-NR- $\beta$ -CD is shown in Figure S2B. The particles were small and formed an amorphous compound. In addition, these

compounds transform and disappear during transmission electron microscopy.

**Figure S3.** The regression equation in a weakly alkaline (A) and an acidic medium (B)

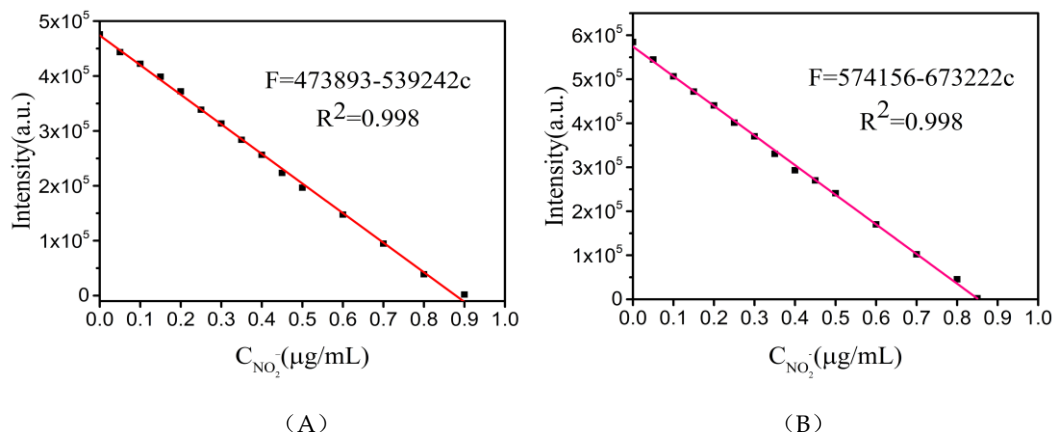

To investigate the detection sensitivity of NR- $\beta$ -CD@AuNPs to  $NO_2^-$  over broad ranges, experiments were designed in both weakly alkaline and acidic media. The resulting regression equations were  $F=473893-539242C$  (Figure S3 A) and  $F=574156-673222C$  (Figure S3 B), respectively, where F is the fluorescence intensity of the solution and C is  $[NO_2^-]$ .

**Figure S4.** (A) Emission spectra of NR in the presence of different  $[NO_2^-]$ , including 0, 0.10, 0.20, 0.30, 0.40, 0.50 and 0.60  $\mu\text{g}\cdot\text{mL}^{-1}$ . (B) Emission spectra of NR- $\beta$ -CD in the presence of different  $[NO_2^-]$ , including 0, 0.20, 0.40, 0.60, 0.80, 1.00, 1.20, 1.40, and 1.6  $\mu\text{g}\cdot\text{mL}^{-1}$ .

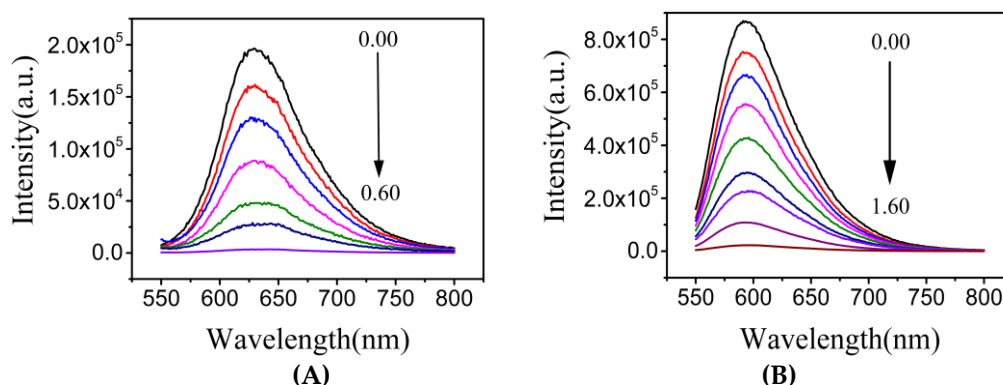

It is clear that the fluorescence intensity of NR at 621 nm was gradually quenched as  $[NO_2^-]$  increased, as shown in Figure S4 (A). A linear relationship was obtained between the fluorescence intensity and  $[NO_2^-]$  over the range of

0.0-0.6  $\mu\text{g}\cdot\text{mL}^{-1}$ . The resulting regression equation was  $F=19358-30497C$ , and the detection limit was 0.56  $\mu\text{g}\cdot\text{mL}^{-1}$ . It is seen in Figure S4 (B) that the fluorescence intensity of NR- $\beta$ -CD at 593 nm was gradually quenched as  $[\text{NO}_2^-]$  increased. The resulting regression equation was  $F=866342-500766C$  over the range of 0.0-1.6  $\mu\text{g}\cdot\text{mL}^{-1}$ , and the detection limit was  $5.6\times 10^{-2}$   $\mu\text{g}\cdot\text{mL}^{-1}$ .

**Table S1.** Comparison of the fabricated sensor with other reported sensors for nitrite ions

| Technique               | Sample type        | LOD ( $\mu\text{g}\cdot\text{mL}^{-1}$ ) | Reference |
|-------------------------|--------------------|------------------------------------------|-----------|
| colorimetric method     | river water        | $7.5\times 10^{-3}$                      | 32        |
| fluorometric method     | water              | $5.52\times 10^{-2}$                     | 34        |
| copper electrode        | sausages           | 0.528                                    | 35        |
| chemiluminescent method | tap and well water | $4.9\times 10^{-3}$                      | 37        |
